# 1 Seasonal and genetic effects on lipid profiles of juvenile Atlantic salmon

2

3 Andrew H. House<sup>1,2,5</sup>, Paul V. Debes<sup>1,2,6</sup>, Minna Holopainen<sup>3,4</sup>, Reijo Käkelä<sup>3,4</sup>, Iikka Donner<sup>1,2</sup>,  
4 Morgane Frapin<sup>1,2</sup>, Ehsan Pashay<sup>1,2</sup>, Johanna Kurko<sup>1,2</sup>, Hanna Ruhanen<sup>3,4</sup>, Craig R. Primmer<sup>1,2</sup>

5

6 1. Organismal and Evolutionary Biology Research Programme, Faculty of Biological and  
7 Environmental Sciences, University of Helsinki, Viikinkaari 9, 00014, Helsinki, Finland

8 2. Institute of Biotechnology, Helsinki Institute of Life Science (HiLIFE), University of Helsinki,  
9 Finland

10 3. Molecular and Integrative Biosciences Research Programme, University of Helsinki, Helsinki,  
11 Finland

12 4. Helsinki University Lipidomics Unit (HiLIPID), Helsinki Institute for Life Science (HiLIFE) and  
13 Biocenter Finland, Helsinki, Finland

14 5. Lammi Biological Station, Faculty of Biological and Environmental Sciences, University of  
15 Helsinki, Pääjärventie 320, 16900, Hämeenlinna, Finland

16 6. Present address: Department of Aquaculture and Fish Biology, Hólar University, Háeyri 1, 550  
17 Sauðárkrúkur, Iceland

18 **Corresponding Author:** Craig Primmer, [craig.primmer@helsinki.fi](mailto:craig.primmer@helsinki.fi)

19 **Address:** Viikinkaari 9 (PL 56), 00790 Helsinki, Finland

## 20 Acknowledgements

21 We acknowledge Ksenia Zueva, Marion Sinclair-Waters, Nico Lorenzen, Spiros Papakostas, and  
22 Victoria Pritchard for their assistance in getting fish gametes in Laukaa hatchery; Suvi Ikonen,  
23 Anna Toikkanen, Shadi Jansouz, Dorian Jagusch, Andres Salgado, Fin Morrison, Ike Van Gestel,  
24 Paul Bangura, and Petra Lijeström for their help in Lammi with husbandry and fish sampling and  
25 Outi Ovaskainen; Miakel Kyriacou, Oona Mehtälä, Oliver Andersson, Pirta Palola, Valeria Valanne,  
26 and Jacqueline Moustakas-Verho for their help during sampling events; Annukka Ruokolainen,  
27 Noora Parre, Shadi Jansouz and Seija Tillanen for their help in the genetics lab and Eirik Åsheim  
28 for his help with manuscript discussions and data wrangling, and Tutku Aykanat for help with data  
29 analysis and discussions.

## 30 Highlights

31

- 32 • Seasonal lipid species profile separation in muscle and liver in juvenile Atlantic  
33 salmon
- 34 • Genotype specific direction of change of membrane lipids from spring to autumn
- 35 • Indirect evidence that a mechanism linking *vgll3* with lipid metabolism and storage  
36 exists

37

## 38 **Abstract**

39 Seasonality can influence many physiological traits requiring optimal energetic capacity for  
40 life-history stage transitions. In Atlantic salmon, high-energy status is essential for the  
41 initiation of maturation. Atlantic salmon lipid reserves are predominantly found in the  
42 viscera and myosepta in the muscle while the liver is essential for maintaining lipid  
43 metabolism. A genomic study found a region including a transcription co-factor-coding  
44 gene, *vgll3*, linked to Atlantic salmon maturation timing, which acts as an inhibitor of  
45 adipogenesis in mice, and mediates maturation via condition factor in Atlantic salmon.  
46 Here we investigate the influence of season and *vgll3* genotypes associating with early  
47 (EE) and late (LL) maturation on lipid profiles in the muscle and liver in juvenile Atlantic  
48 salmon. We reared Atlantic salmon for two years until the occurrence of sexually mature  
49 males and sampled muscle and liver at two time points: spring and autumn of the second  
50 year. We found no seasonal or genotype effect in lipid profiles in muscle of immature  
51 males and females. However, in the liver we did detect a triacylglycerol (TG) enrichment  
52 and a genotype specific direction of change in membrane lipids, phosphatidylcholine (PC)  
53 and phosphatidylethanolamine (PE), from spring to autumn. Specifically, from spring to  
54 autumn membrane lipid concentrations increased in *vgll3*\*EE individuals and decreased in  
55 *vgll3*\*LL individuals. This could be explained with two possible scenarios 1) a seasonally  
56 more stable capacity of endoplasmic reticulum (ER) functions in *vgll3*\*EE individuals  
57 compared to *vgll3*\*LL individuals or 2) *vgll3*\*LL individuals storing larger lipid droplets from  
58 spring to autumn in the liver compared to *vgll3*\*EE individuals at the expense of ER  
59 capacity. This genotype specific seasonal direction of change in membrane lipid  
60 concentrations provides more indirect evidence that a mechanism linking *vgll3* with lipid  
61 metabolism and storage exists.

## 62 **Introduction**

63 Many physiological traits of fish change in a seasonal manner. The appropriate timing of  
64 such changes is critical for the optimal transition between life-history stages, such as the  
65 transition from an immature to a mature individual, which require sufficient energy  
66 reserves, such as lipids, to be achieved successfully (N. Jonsson & Jonsson, 2003; Rowe  
67 et al., 1991; Taranger et al. 2010). Lipid metabolism involves synthesis of membrane  
68 phospholipids for physiological functional capacity and synthesis of triacylglycerol (TG) to  
69 be able to fuel the metabolic functions. Thus studying lipid metabolism helps to understand  
70 how life-history progressions are achieved (reviewed in Tocher, 2003). Due to its

71 predominantly anadromous life-history strategy, Atlantic salmon must rapidly transition  
72 between energy usage and storage in order to achieve the necessary physiological  
73 changes required for sexual maturation at varying ages and sizes (B. Jonsson & Jonsson,  
74 2005; Post & Parkinson, 2001). Historically, body condition (the relative mass of an  
75 individual given its length), also referred to as condition factor, has been used as a proxy  
76 of an individual's lipid reserves and thereby, its energy status (Herbinger & Friars, 1991;  
77 Schulte-Hostedde et al., 2005; Sutton et al., 2000). Direct quantification of body lipid  
78 reserves has also been used to study the role of lipids in the maturation of fish (Shearer &  
79 Swanson, 2000). Currently, detailed mass spectrometric profiling of structurally diverse  
80 lipid species enables acquiring an even more accurate view on an individual's  
81 physiological status (reviewed in Rey et al., 2022).

82 Atlantic salmon is a species accumulating high lipid content in various tissues (Henriques  
83 et al., 2014; Vuorinen et al., 2020). Looking at seasonal metabolic changes of salmon  
84 juveniles, and identifying tissue specific roles for lipids, may give insight into how metabolic  
85 differences of the juveniles influences their energy reserves, growth and maturation. The  
86 fatty acids are mobilized from the main triacylglycerol (TG) storage locations, which are in  
87 the myosepta in between muscle fibers and the visceral cavity along the intestine  
88 (Henderson & Tocher, 1987; N. Jonsson et al., 1997; Morgan et al., 2002; Sheridan,  
89 1988). TG is the primary long-term energy source in most aerobic organisms (Yeo &  
90 Parrish, 2022), while membrane lipids, largely comprised of phosphatidylcholine (PC) and  
91 phosphatidylethanolamine (PE), respond to thermal acclimatization and contribute to  
92 maintaining activities of integral proteins (Kraffe et al., 2007). If TG reserves become  
93 limited, also the membrane lipids can be broken down for energy, but at the cost of  
94 physiological performance (Tonning et al., 2021). The liver is an important organ for fatty  
95 acid and lipid synthesis and lipoprotein production but also serves as the main regulator of  
96 lipid metabolism (Jensen-Urstad & Semenkovich, 2012; N. Jonsson et al., 1997; Sissener  
97 et al., 2017; Yeo & Parrish, 2022). Mobilizing lipids is key to enabling transitions between  
98 major life stages and ultimately survival (Manor et al., 2014; Tocher, 2003). Hence,  
99 alterations in the liver and muscle contents of storage and membrane lipid profiles can  
100 help us understand differences in physiological traits between individuals.

101 Sexual maturation is a process that involves massive energy investments and depletions  
102 and the age at which this occurs can have dramatic effects on individual fitness (N.  
103 Jonsson et al., 1991). Partly for these reasons, understanding environmental, genetic and

104 physiological factors affecting age at maturity in Atlantic salmon has been a popular  
105 research topic for decades. In addition, salmon age at maturity is also of applied  
106 importance in aquaculture, natural population conservation and sustainable management  
107 (reviewed in Mobley et al., 2021). A genome-wide association study earlier identified a  
108 genome region including a transcription co-factor-coding gene, *vgll3* (*vestigial-like family*  
109 *member 3*), found to be linked to Atlantic salmon maturation age with two alleles, E and L,  
110 associating with earlier or later maturation, respectively in male and female salmon (Ayllon  
111 et al., 2015; Barson et al., 2015). *Vgll3* had been found to inhibit adipogenesis in mice,  
112 (Halperin et al., 2013), and adiposity is well known to promote puberty in many fishes,  
113 including salmon (Taranger et al. 2010), thus making *vgll3* effects on adiposity a plausible  
114 mechanism influencing age at maturity in salmon. The association between *vgll3* and  
115 salmon maturation timing has been supported in several common garden experiments  
116 (Åsheim et al., 2023; Ayllon et al., 2019; Debes et al., 2021; House et al., 2021; Sinclair-  
117 Waters, Nome, et al., 2022; Sinclair-Waters, Piavchenko, et al., 2022). Further supporting  
118 an association with body energy allocation, several studies have identified body condition  
119 differences between individuals with alternative *vgll3* genotypes, *vgll3*\*EE juveniles having  
120 higher body condition (Debes et al., 2021) and more stable body condition throughout the  
121 year (House et al., 2023). This stability, in particular the maintenance of higher body  
122 condition in the spring, was suggested to contribute to the earlier maturation of males with  
123 the *vgll3*\*EE genotype in autumn (House et al. 2023). Body condition, however, only  
124 provides a very rough approximation of body lipid reserves, and cannot provide  
125 information about the relative role of different lipid classes in different tissues. Therefore, a  
126 more detailed assessment of lipid classes and individual lipid species profiles within each  
127 lipid class is warranted in order to better understand the metabolic processes and  
128 capabilities during salmon life history stage transitions.

129 Here we address this knowledge gap by investigating tissue specific TG, PC and PE lipid  
130 classes, and lipid species profiles within each class, in the context of seasonality and *vgll3*  
131 genotype in juvenile male and female Atlantic salmon. We reared salmon juveniles from  
132 fertilization for two years and assessed temporal, environmental and genetic *vgll3* effects,  
133 as well as their interactions, on lipid profiles in the muscle and liver.

## 134 **Methods**

### 135 *Salmon material and sampling*

136 Atlantic salmon juveniles used in this study were the offspring of a first-generation Atlantic  
137 salmon hatchery stock maintained by the Natural Resources Institute Finland (62°24'50"N,  
138 025°57'15"E, Laukaa, Finland). In October 2017, unrelated adults with homozygous *vgll3*  
139 genotypes were crossed to create 24 families (six 2 x 2 factorials) where each factorial  
140 included a *vgll3\*EE* male and female and a *vgll3\*LL* male and female. Eggs of each family  
141 were divided and incubated in two replicate vertical incubators at ~4.78 °C before transfer  
142 to Lammi Biological Station (61°04'45"N, 025°00'40"E, Lammi, Finland) on April 28<sup>th</sup> 2018,  
143 when they approached the developmental age of first feeding (alevin). Roughly equal  
144 numbers of individuals from each family were then placed in five flow-through circular  
145 tanks (diameter 90 cm) with water sourced from a nearby lake, Lake Pääjärvi, following the  
146 natural annual water temperature cycle (Figure 1). The temperature range for the  
147 individuals during the course of the experiment was 1.30-19.04 °C. The average water  
148 temperature individuals experienced across the entire experiment was 9.14 °C. Fish were  
149 fed *ad libitum* for the duration of the experiment with commercial fish food, the pellet size  
150 of which matched the requirements set by the size distribution of the individuals (Raisio  
151 Baltic Blend; Raisio Oy). We euthanized and collected tissues from initially 145 individuals  
152 (we used less for lipid analyses) at two different time points during this experiment, May  
153 and October 2019, representing different seasons, and thus will be referred to as spring  
154 and autumn respectively. Liver and muscle tissue for lipid analyses were weighed and  
155 flash frozen while gill tissue for determination of smoltification status (see below) was  
156 placed in RNAlater for later laboratory analysis. At both sampling periods, individuals were  
157 fasted for 24 h and then euthanized by anesthetic overdose of tricaine methanesulphonate  
158 (sodium bicarbonate-buffered). Wet mass ( $\pm$  0.01 g) and fork length ( $\pm$  1 mm) were  
159 measured and gonad development checked to determine maturity status as described in  
160 Debes et al. (2021) and a fin clip sampled for genetic analyses. Samples were genotyped  
161 with 141 single nucleotide polymorphisms (SNPs) and a sexing marker (Aykanat et al.,  
162 2016), and the genetic information used to subsequently determine the *vgll3* genotype and  
163 sex of each individual, as well as to assign them to their family of origin as outlined in  
164 Debes et al. (2021).

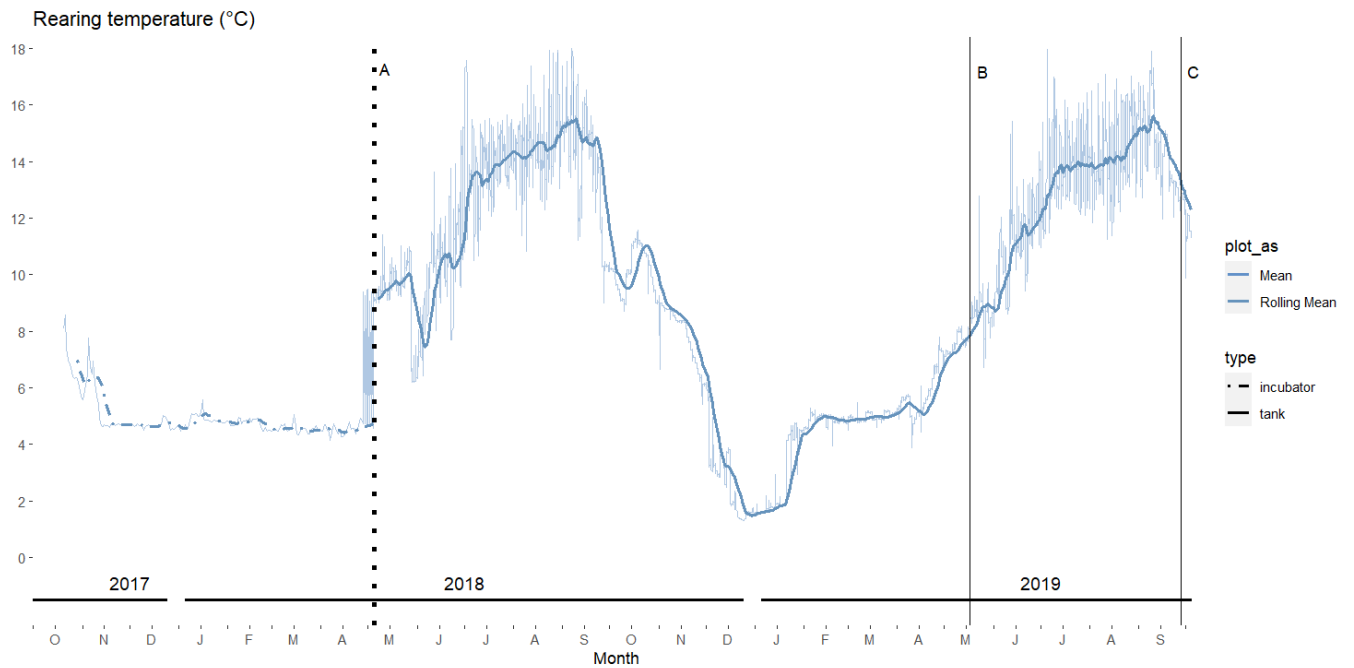

165

166

167 **Figure 1:** Temperature curve for the experiment from fertilization to final sampling time point. **A)**  
168 Transfer date to Lammi Biological Station; **B)** and **C)** are spring and autumn sampling time points,  
169 respectively, with routine measurements and tissue sampling of 145 individuals

### 170 *Smolt ID Gene expression*

171 A proportion of individuals were observed to have undergone the smoltification process (a  
172 physiological and behavioral transition enabling migration from fresh to salt water) in the  
173 spring when the first samples were taken. As smoltification can affect lipid storage and use  
174 (Sheridan, 1989), and thus potentially confound detection of changes in lipid profiles  
175 related to maturation, we limited our study on individuals lacking clear morphological and  
176 gene transcription signs and thus indicating a commencement lack of the smoltification  
177 process. Transcriptional signs were assessed by reverse-transcription quantitative PCR  
178 (RT-qPCR) using the RNA ratio of two gill-expressed marker genes, *atp1a1a.1α* and  
179 *atp1a1a.1β*, that have earlier been used for identification of smoltification in Atlantic  
180 salmon, and for two already validated stable reference genes in gills; *dnaja2a* and *ef1a*  
181 (Piironen et al., 2013). Gills stored in RNAlater were homogenized prior to extraction with a  
182 bead mill homogenizer, Bead Ruptor Elite (Omni International Inc.), and RNA was isolated  
183 using the NucleoSpin RNA kit (Macherey-Nagel GmbH & Co. KG) and assessed with  
184 NanoDrop ND-1000. cDNA synthesis was performed for 57 samples using 500 ng of RNA  
185 per sample and the iScript cDNA Synthesis Kit (Bio-Rad Laboratories, Inc.). qPCR primers  
186 for the abovementioned genes were designed as described in Ahi & Sefc, (2018) using the

187 online tools OligoAnalyzer 3.1 (Integrated DNA Technology) and Primer Express 3.0  
188 (Applied Biosystems, CA, USA). Primer efficiencies (E) were calculated through standard  
189 curves of serial dilutions of pooled cDNA (random samples) and the following formula:  $E =$   
190  $10^{-1/\text{slope}}$  (Supplementary data Table S1). The qPCR reactions were prepared as  
191 described in Ahi & Sefc, (2018), using PowerUp SYBR Green Master Mix (Thermo Fischer  
192 Scientific), and the Bio-Rad CFX96 Touch Real Time PCR Detection system (Bio-Rad,  
193 Hercules, CA, USA). To detect the smoltification status, the ratios of the RQ values of the  
194 two marker genes (RQ of *atp1a1a.1 $\alpha$*  / RQ of *atp1a1a.1 $\beta$* ) were determined as described  
195 by Piironen et al., (2013). Fish with a relative expression ratio < 1 were considered as  
196 having commenced smoltification (n = 114), and were not considered for further analysis.

### 197 *Sample Selection and Lipid Analysis*

198 Samples were selected with the aim of having similar numbers per time point, *vgll3*  
199 genotype, and sex for both tissues with final sample sizes being n = 30 for liver, and n = 38  
200 for muscle. Muscle and liver were thawed and a piece (4.0-141.8 mg) was cut and  
201 weighed before lipid extraction according to the chloroform and methanol based protocol  
202 of Folch et al., (1957). A standardized amount of each lipid extract was diluted in  
203 chloroform/methanol 1:2 for a volume of 5  $\mu$ l then injected into the Agilent 1290 Infinity  
204 HPLC system. Chromatographic separation was conducted in a gradient mode with a  
205 Luna Omega C18 100 Å (50 x 2.1 mm, 1.6  $\mu$ m) column (Phenomenex), and employing an  
206 acetonitrile/water/isopropanol-based solvent system (Breitkopf et al., 2017) with the flow  
207 rate of 0.200 ml/min and 25 °C as the column temperature. Internal lipid standards TG  
208 14:0/14:0/14:0 (NU-CHEK PREP), PC 14:1/14:1 and PE 14:0/14:0 (Avanti Polar Lipids)  
209 were included with each sample. The column eluent was infused into the electrospray  
210 source of an Agilent 6490 Triple Quad LC/MS with iFunnel Technology and spectra were  
211 recorded using both positive and negative ionization modes. TG species were detected as  
212  $[M+NH_4]^+$  ions from MS+ scan. PC species were identified from a Precursor ion 184 scan  
213 and quantified from a MS+ scan. Additionally, PE species were identified from a Neutral  
214 loss 141 scan and quantified from a MS- scan. Spectra were extracted from the  
215 chromatogram with Agilent MassHunter Qualitative Navigator v B.08.00 according to  
216 known elution time windows for TG, PC, and PE, and the individual lipid species in each  
217 class were identified and quantified using LIMSA software on Excel according to Haimi et  
218 al. (2006). Lipid species below 0.5 mol% in a given tissue were removed from the analysis.  
219 Concentration values were calculated as pmol/mg tissue. The lipid (isobaric) species are

220 marked as follows: [sum of acyl chain carbons]:[sum of acyl chain double bonds] (e.g.,  
221 38:4). Total concentration of each lipid class was calculated by summing up all lipid  
222 species concentrations of a class for each individual. For each class of lipid, the species  
223 concentration data were used to calculate mol% species profile. Neutral lipid (TG) versus  
224 membrane lipid (PC & PE) ratios are also reported in Table 1 and Table 2.

## 225 *Statistical Analysis*

226 Each lipid class or species was log transformed and scaled (each value was subtracted by  
227 the mean of the variable, followed by dividing by the standard deviation) before analysis  
228 (van den Berg et al., 2006). Exploratory principal component analyses (PCA) were carried  
229 out first for each tissue separately using mol% of lipid species to assess the relationship  
230 between independent variables. Additionally, only immature females and males were  
231 included when testing the differences of total concentration of lipid class between spring  
232 and autumn time points and genotypes. Linear mixed effects models were used to test  
233 response variable (TG, PC, PE) interactions with fixed effects including Sex (male/female),  
234 *vgll3* Genotype (*vgll3*\*EE/*vgll3*\*LL), Time Point (spring/autumn), Maturation Status  
235 (immature/mature), and fitting random terms for tank and family. All statistical analyses  
236 were conducted using R version 4.2.0 and RStudio 2022.07.2 with packages factoextra,  
237 lmerTest, lme4, performance for analysis and tidyverse, ggplot2 and ggpubr for visualizing  
238 the data and results (Wickham, 2011; Wickham et al., 2019).

## 239 **Results**

### 240 *Muscle lipid profile stability and Liver TG enrichment between seasons*

241 Lipid concentrations of TG, PC and PE in the muscle and liver of juvenile Atlantic salmon  
242 are reported in Table 1 and Table 2, respectively. Muscle lipids were composed primarily  
243 of the TG lipid class in both the spring (81.5%) and the autumn (75.3%) (Table 1). No  
244 significant differences were detected in the concentrations of each lipid class in the muscle  
245 between individuals of different *vgll3* genotype, sex or season (Table 3). In contrast, the  
246 liver lipid concentrations showed statistically significant differences for each lipid class  
247 studied (Tables 2, 3). PC had the highest mol% in liver lipids in the spring (57.8%) while  
248 TG had the highest mol% in liver in the autumn displaying a fourfold enrichment from  
249 spring to autumn (15.6 to 62.4%). The liver ratio of TG/(PC+PE) also changed by almost  
250 an order of magnitude from the spring to the autumn (0.2 to 1.8).



251 **Table 1:** Muscle lipid class concentrations, mol% composition, and TG/(PC +PE) ratios per time point, sex and *vgll3* genotype (EE = early  
 252 maturation genotype, LL= late maturation genotype) of 2-year old immature (imm) or mature (mat) male (M) and female (F) Atlantic salmon  
 253 (mean  $\pm$  SD).

| MUSCLE                      |                  |                       | CONCENTRATION (PMOL/MG) |                  |                  | MOLAR %        |                 |                | TG/(PC+PE)<br>RATIO |
|-----------------------------|------------------|-----------------------|-------------------------|------------------|------------------|----------------|-----------------|----------------|---------------------|
|                             | Sex              | <i>vgll3</i> genotype | Total TG                | Total PC         | Total PE         | Total TG       | Total PC        | Total PE       |                     |
| <b>SPRING</b>               | F_imm<br>(n = 8) |                       | 568.0 $\pm$ 172         | 107.0 $\pm$ 12.3 | 77.3 $\pm$ 6.85  | 75.5 $\pm$ 0.5 | 14.2 $\pm$ 4.6  | 10.3 $\pm$ 3.5 | 2.9 $\pm$ 0.7       |
|                             |                  | EE (n = 4)            | 268.0 $\pm$ 127         | 100.0 $\pm$ 6.83 | 71.2 $\pm$ 4.42  | 61.1 $\pm$ 0.4 | 22.7 $\pm$ 6.84 | 16.2 $\pm$ 5.5 | 1.5 $\pm$ 0.7       |
|                             |                  | LL (n = 4)            | 866.0 $\pm$ 250         | 113.0 $\pm$ 25.2 | 83.4 $\pm$ 13.2  | 81.5 $\pm$ 0.8 | 10.6 $\pm$ 1.0  | 7.9 $\pm$ 2.0  | 4.2 $\pm$ 0.7       |
|                             | M_imm<br>(n = 8) |                       | 1079.0 $\pm$ 527        | 109.0 $\pm$ 7.39 | 81.7 $\pm$ 4.09  | 85.0 $\pm$ 1.6 | 8.6 $\pm$ 4.2   | 6.4 $\pm$ 3.5  | 5 $\pm$ 2.1         |
|                             |                  | EE (n = 4)            | 1721 $\pm$ 994          | 120.0 $\pm$ 12.9 | 86.8 $\pm$ 7.74  | 89.3 $\pm$ 3.1 | 6.2 $\pm$ 4.0   | 4.5 $\pm$ 2.8  | 7.5 $\pm$ 3.82      |
|                             |                  | LL (n = 4)            | 437 $\pm$ 186           | 97.6 $\pm$ 1.67  | 76.5 $\pm$ 0.67  | 71.5 $\pm$ 0.6 | 16.0 $\pm$ 6.9  | 12.5 $\pm$ 5.9 | 2.5 $\pm$ 1         |
| <b>OVERALL<br/>(SPRING)</b> |                  |                       | 823.3 $\pm$ 276         | 107.8 $\pm$ 7.0  | 79.5 $\pm$ 3.9   | 81.5 $\pm$ 0.3 | 10.1 $\pm$ 3.0  | 7.9 $\pm$ 2.41 | 3.92 $\pm$ 1.1      |
| <b>AUTUMN</b>               | F_imm<br>(n = 8) |                       | 555.0 $\pm$ 100         | 108.0 $\pm$ 9.59 | 69.2 $\pm$ 5.12  | 75.8 $\pm$ 0.3 | 14.8 $\pm$ 3.3  | 9.5 $\pm$ 2.3  | 3.2 $\pm$ 0.5       |
|                             |                  | EE (n = 4)            | 524.0 $\pm$ 169         | 113.0 $\pm$ 11.0 | 72.1 $\pm$ 6.86  | 73.9 $\pm$ 0.5 | 15.9 $\pm$ 6.5  | 10.2 $\pm$ 4.1 | 2.9 $\pm$ 0.9       |
|                             |                  | LL (n = 4)            | 585.0 $\pm$ 133         | 104.0 $\pm$ 17.2 | 66.3 $\pm$ 8.35  | 77.5 $\pm$ 0.4 | 13.8 $\pm$ 2.2  | 8.8 $\pm$ 2.2  | 3.5 $\pm$ 0.6       |
|                             | M_imm<br>(n = 8) |                       | 405.0 $\pm$ 56.8        | 103.0 $\pm$ 12.0 | 61.3 $\pm$ 3.56  | 71.1 $\pm$ 0.2 | 18.1 $\pm$ 2.0  | 10.8 $\pm$ 1.1 | 2.6 $\pm$ 0.5       |
|                             |                  | EE (n = 4)            | 417.0 $\pm$ 60          | 113.0 $\pm$ 22.0 | 64.6 $\pm$ 7.12  | 70.1 $\pm$ 0.2 | 19.0 $\pm$ 1.0  | 10.9 $\pm$ 1.0 | 2.4 $\pm$ 0.2       |
|                             |                  | LL (n = 4)            | 393.0 $\pm$ 107         | 93.7 $\pm$ 10.9  | 58.0 $\pm$ 1.08  | 72.1 $\pm$ 0.3 | 17.2 $\pm$ 4.3  | 10.6 $\pm$ 2.2 | 2.68 $\pm$ 1.0      |
|                             | M_mat<br>(n = 6) |                       | 771.0 $\pm$ 299         | 129.0 $\pm$ 12.4 | 87.6 $\pm$ 9.73  | 78.1 $\pm$ 0.9 | 13.1 $\pm$ 7.3  | 8.9 $\pm$ 4.3  | 3.2 $\pm$ 1.16      |
|                             |                  | EE (n = 4)            | 381.0 $\pm$ 240         | 115.0 $\pm$ 13.3 | 79.4 $\pm$ 10.5  | 66.2 $\pm$ 0.7 | 20.0 $\pm$ 9.3  | 13.8 $\pm$ 5.1 | 1.8 $\pm$ 1.1       |
|                             |                  | LL (n = 2)            | 1550.0 $\pm$ 298        | 157.0 $\pm$ 9.11 | 104.0 $\pm$ 18.7 | 85.6 $\pm$ 0.9 | 8.7 $\pm$ 0.9   | 5.7 $\pm$ 2.0  | 6.0 $\pm$ 1.4       |
| <b>OVERALL<br/>(AUTUMN)</b> |                  |                       | 558 $\pm$ 91.8          | 112 $\pm$ 6.62   | 71.3 $\pm$ 4.01  | 75.3 $\pm$ 0.3 | 15.1 $\pm$ 2.4  | 9.9 $\pm$ 1.5  | 3 $\pm$ 0.4         |
| <b>OVERALL</b>              |                  |                       | 670 $\pm$ 127           | 110.4 $\pm$ 4.8  | 74.8 $\pm$ 2.9   | 78.3 $\pm$ 0.4 | 13.0 $\pm$ 1.8  | 8.7 $\pm$ 1.3  | 3.4 $\pm$ 0.5       |

254 **Table 2:** Liver lipid class concentrations, mol% composition, and TG/(PC +PE) ratios per time point, sex and *vgll3* genotype (EE = early  
 255 maturation genotype, LL= late maturation genotype) of 2-year old immature (imm) or mature (mat) male (M) and female (F) Atlantic salmon  
 256 (mean  $\pm$  SD).

| LIVER                   |               | vgll3 genotype | CONCENTRATION (PMOL/MG) |                  |                  | MOLAR %         |                 |                 | TG/(PC+PE)<br>RATIO |
|-------------------------|---------------|----------------|-------------------------|------------------|------------------|-----------------|-----------------|-----------------|---------------------|
|                         |               |                | Total TG                | Total PC         | Total PE         | Total TG        | Total PC        | Total PE        |                     |
| <b>SPRING</b>           | Sex           |                |                         |                  |                  |                 |                 |                 |                     |
|                         | F_imm (n = 6) |                | 74.6 $\pm$ 36.2         | 270.0 $\pm$ 25.9 | 125.0 $\pm$ 16.5 | 15.9 $\pm$ 6.2  | 57.5 $\pm$ 3.8  | 26.6 $\pm$ 2.51 | 0.22 $\pm$ 0.1      |
|                         |               | EE (n = 4)     | 98.4 $\pm$ 52.0         | 239.0 $\pm$ 7.47 | 104.0 $\pm$ 8.72 | 22.3 $\pm$ 8.5  | 54.1 $\pm$ 5.6  | 23.6 $\pm$ 3.1  | 0.3 $\pm$ 0.2       |
|                         |               | LL (n = 2)     | 27.1 $\pm$ 9.44         | 331.0 $\pm$ 64.3 | 167.0 $\pm$ 31.4 | 5.2 $\pm$ 0.8   | 63.0 $\pm$ 0.4  | 31.8 $\pm$ 0.4  | 0.05 $\pm$ 0.01     |
|                         | M_imm (n = 5) |                | 77.2 $\pm$ 31.7         | 295.0 $\pm$ 26.1 | 134.0 $\pm$ 18.9 | 15.3 $\pm$ 4.5  | 58.3 $\pm$ 4.2  | 26.5 $\pm$ 1.8  | 0.18 $\pm$ 0.1      |
|                         |               | EE (n = 2)     | 113.0 $\pm$ 78.1        | 276.0 $\pm$ 28.7 | 113.0 $\pm$ 26.6 | 22.5 $\pm$ 10.3 | 55.0 $\pm$ 9.5  | 22.5 $\pm$ 0.8  | 0.27 $\pm$ 0.2      |
|                         |               | LL (n = 3)     | 53.1 $\pm$ 24.4         | 307.0 $\pm$ 42.4 | 148.0 $\pm$ 26.6 | 10.5 $\pm$ 3.5  | 60.4 $\pm$ 5.1  | 29.1 $\pm$ 1.7  | 0.1 $\pm$ 0.04      |
| <b>OVERALL (SPRING)</b> |               |                | 75.8 $\pm$ 23.3         | 281 $\pm$ 17.9   | 129 $\pm$ 11.9   | 15.6 $\pm$ 3.8  | 57.8 $\pm$ 2.7  | 26.6 $\pm$ 1.5  | 0.2 $\pm$ 0.1       |
| <b>AUTUMN</b>           | F_imm (n = 7) |                | 568.0 $\pm$ 113         | 286.0 $\pm$ 37.1 | 123.0 $\pm$ 9.82 | 58.1 $\pm$ 4.3  | 29.3 $\pm$ 3.0  | 12.6 $\pm$ 1.6  | 1.4 $\pm$ 0.2       |
|                         |               | EE (n = 4)     | 566.0 $\pm$ 176         | 332.0 $\pm$ 52.3 | 133.0 $\pm$ 15.8 | 54.9 $\pm$ 6.3  | 32.2 $\pm$ 4.2  | 12.9 $\pm$ 2.1  | 1.17 $\pm$ 0.3      |
|                         |               | LL (n = 3)     | 570.0 $\pm$ 168         | 226.0 $\pm$ 30.7 | 109.0 $\pm$ 2.15 | 63.0 $\pm$ 5.0  | 25.0 $\pm$ 2.2  | 12.0 $\pm$ 2.8  | 1.6 $\pm$ 0.3       |
|                         | M_imm (n = 7) |                | 682.0 $\pm$ 231         | 295.0 $\pm$ 62   | 125.0 $\pm$ 20.1 | 61.9 $\pm$ 8.0  | 26.8 $\pm$ 5.9  | 11.3 $\pm$ 2.3  | 1.9 $\pm$ 0.6       |
|                         |               | EE (n = 3)     | 854.0 $\pm$ 466         | 411.0 $\pm$ 76.1 | 163.0 $\pm$ 22.7 | 59.8 $\pm$ 15.5 | 28.8 $\pm$ 11.4 | 11.4 $\pm$ 4.2  | 1.8 $\pm$ 1.1       |
|                         |               | LL (n = 3)     | 509.0 $\pm$ 138         | 179.0 $\pm$ 4.26 | 86.1 $\pm$ 5.83  | 65.8 $\pm$ 7.1  | 23.1 $\pm$ 4.4  | 11.1 $\pm$ 2.8  | 1.9 $\pm$ 0.5       |
|                         | M_mat (n = 6) |                | 713.0 $\pm$ 167         | 231.0 $\pm$ 14.9 | 111.0 $\pm$ 12.3 | 67.6 $\pm$ 5.9  | 21.9 $\pm$ 4.3  | 10.5 $\pm$ 1.6  | 2.1 $\pm$ 0.5       |
|                         |               | EE (n = 4)     | 773.0 $\pm$ 249         | 232.0 $\pm$ 21.4 | 115.0 $\pm$ 19.0 | 69.0 $\pm$ 8.8  | 20.7 $\pm$ 6.3  | 10.3 $\pm$ 2.6  | 2.3 $\pm$ 0.7       |
|                         |               | LL (n = 2)     | 592.0 $\pm$ 147         | 229.0 $\pm$ 23.9 | 104.0 $\pm$ 4.68 | 64.0 $\pm$ 7.2  | 24.8 $\pm$ 6.1  | 11.2 $\pm$ 1.0  | 1.8 $\pm$ 0.5       |
| <b>OVERALL (AUTUMN)</b> |               |                | 649 $\pm$ 94.4          | 271 $\pm$ 23.8   | 120 $\pm$ 7.91   | 62.4 $\pm$ 3.4  | 26.1 $\pm$ 2.5  | 11.5 $\pm$ 1.0  | 1.8 $\pm$ 0.2       |
| <b>OVERALL</b>          |               |                | 74.6 $\pm$ 36.2         | 270.0 $\pm$ 25.9 | 125.0 $\pm$ 16.5 | 43.8 $\pm$      | 38.8 $\pm$ 3.3  | 17.5 $\pm$ 1.5  | 0.22 $\pm$ 0.1      |

258 *Clear lipid species profile differences between seasons*

259 In muscle tissue, 58, 32, and 14 lipid species were detected for TG, PC, and PE,  
260 respectively, while in the liver, 44, 39, and 15 lipid species were detected for TG, PC, and  
261 PE, respectively. PCA visualization of individual-level lipid species patterns revealed a  
262 clear separation in the lipid species composition between seasons in both tissues (Figure  
263 2). Specifically, the spring and autumn samples of muscle separate along the second  
264 principal component explaining 21% of the variation (Figure 2A). In muscle, the degree of  
265 unsaturation of TG species was in general higher in the spring samples (total of 6–8  
266 double bonds in the acyl chains of the molecule) than in the autumn samples (3–5 double  
267 bonds) (Figure 2A). In contrast, the spring and autumn samples of liver separate along the  
268 first component explaining 89% of the variation (Figure 2B), likely due to the dramatic  
269 enrichment in TG mol% values from spring to autumn. In both tissues, the quantitatively  
270 most important PC and PE species 38:6 is enriched in the spring samples. The PCA biplot  
271 of muscle shows an interesting shift, since in the spring the lipid species that have the  
272 highest double bond contents (more biochemically available, (Raclot, 2003)) are TG  
273 species (e.g., TGs 56:7 and 56:8) and in the autumn the species with the highest double  
274 bond contents are phospholipid species (PC 40:7 and PE 40:7, most likely containing a  
275 22:6n-3 acyl chain).

276

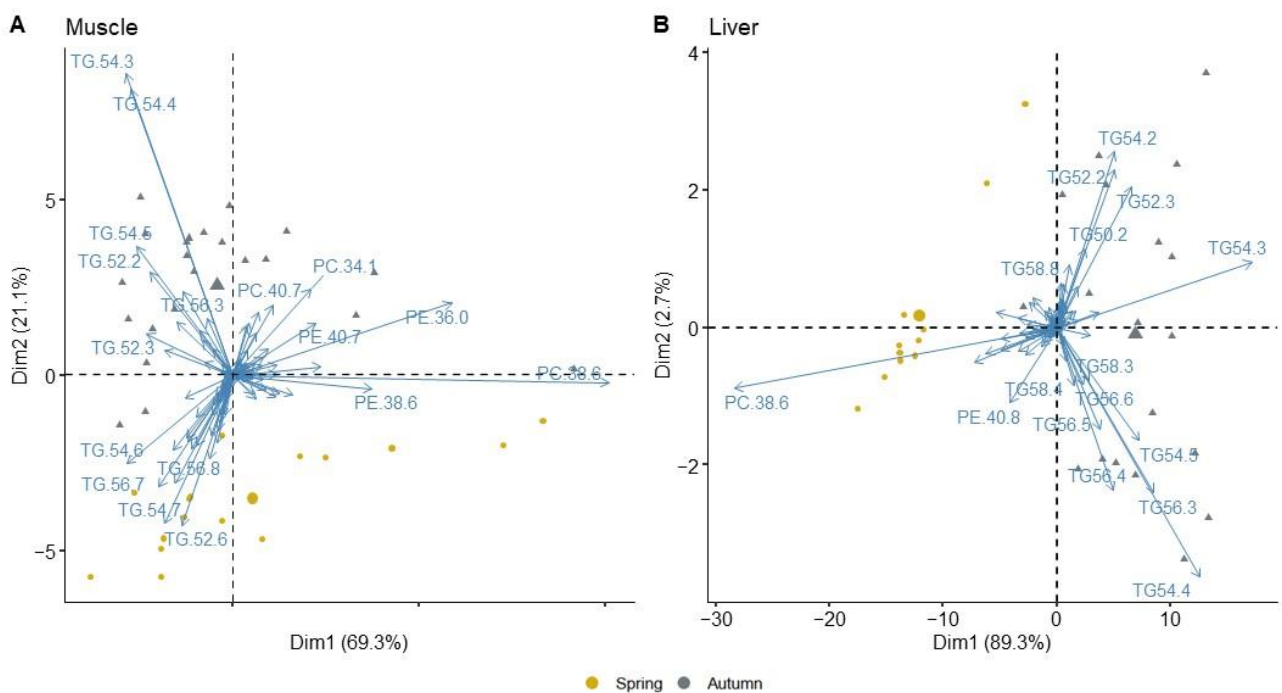

277

278 **Figure 2:** PCA showing principal component 1 and 2 for mol% of lipid species in A) muscle (n =  
 279 38), and B) liver (n = 30). Yellow dots indicate spring and gray triangles indicate autumn samples  
 280 with the largest symbols of each representing the mean of each season group. Arrows show  
 281 loadings of separate lipid species contributing most to each principal component.

282  
 283 *Vgll3* and season effects on muscle and liver lipid concentrations

284 There were no statistically significant differences of lipid class concentrations in the muscle  
 285 when comparing spring and autumn samples, nor when comparing sexes or *vgll3*  
 286 genotypes (Table 3, Figure 3). In contrast, in liver tissue, several statistically significant  
 287 differences in lipid class concentrations were identified (Table 3). In the liver, TG  
 288 concentrations were significantly higher in the autumn than in the spring (Table 3, Figure  
 289 4A). There were also differences in PC and PE concentrations between *vgll3* genotypes  
 290 and spring and autumn: immature *vgll3*\*EE individuals increase or maintain their liver PC  
 291 and PE concentrations from spring to autumn, whereas these concentrations decrease in  
 292 *vgll3*\*LL individuals towards the autumn (Table 3, Figure 4B, C). This resulted in a highly  
 293 statistically significant interaction between *vgll3* genotype and season for both PC and PE  
 294 concentrations, whereby liver PC and PE concentrations of *vgll3*\*LL individuals decreased  
 295 from spring to autumn while the seasonal change in concentration was the opposite in  
 296 *vgll3*\*EE individuals (Table 3, Figure 4B, C).

297 **Table 3:** Model results based on samples from immature males and females with sex  
 298 (male/female), *vgll3* genotype (*vgll3*\*EE = early maturation/*vgll3*\*LL = late maturation), and  
 299 time point (spring/autumn).

300

| Muscle |                      |          |       |        |         |       |
|--------|----------------------|----------|-------|--------|---------|-------|
| TG     | Terms                | Estimate | SE    | df     | t-value | p     |
|        | Time_Point           | 0.144    | 0.608 | 25.772 | 0.237   | 0.814 |
|        | Sexm                 | -0.372   | 2.498 | 25.914 | -0.149  | 0.883 |
|        | Vgll3*LL             | 0.785    | 2.402 | 24.820 | 0.327   | 0.747 |
|        | Time_Point:Sexm      | 0.084    | 0.706 | 25.893 | 0.119   | 0.906 |
|        | Time_Point: Vgll3*LL | -0.289   | 0.679 | 24.819 | -0.425  | 0.675 |
|        |                      |          |       |        |         |       |
| PC     |                      | Estimate | SE    | df     | t-value | p     |
|        | Time_Point           | -0.068   | 0.168 | 25.989 | -0.401  | 0.692 |
|        | Sexm                 | -0.388   | 0.684 | 24.029 | -0.567  | 0.576 |
|        | Vgll3*LL             | -0.142   | 0.686 | 25.455 | -0.208  | 0.837 |
|        | Time_Point:Sexm      | 0.112    | 0.193 | 23.637 | 0.578   | 0.569 |
|        | Time_Point: Vgll3*LL | 0.070    | 0.194 | 25.274 | 0.363   | 0.720 |
|        |                      |          |       |        |         |       |

| PE    |                      | Estimate | SE    | df     | t-value | p            |
|-------|----------------------|----------|-------|--------|---------|--------------|
|       | Time_Point           | 0.056    | 0.120 | 26.000 | 0.463   | 0.647        |
|       | Sexm                 | -0.623   | 0.492 | 26.000 | -1.267  | 0.216        |
|       | Vgll3*LL             | -0.306   | 0.492 | 26.000 | -0.621  | 0.540        |
|       | Time_Point:Sexm      | 0.183    | 0.139 | 26.000 | 1.318   | 0.199        |
|       | Time_Point: Vgll3*LL | 0.100    | 0.139 | 26.000 | 0.721   | 0.478        |
|       |                      |          |       |        |         |              |
| Liver |                      |          |       |        |         |              |
| TG    | Terms                | Estimate | SE    | df     | t-value | p            |
|       | Time_Point           | -1.865   | 0.489 | 17.860 | -3.812  | <b>0.001</b> |
|       | Sexm                 | -0.422   | 2.269 | 17.999 | -0.186  | 0.854        |
|       | Vgll3*LL             | 3.886    | 2.253 | 17.884 | 1.725   | 0.102        |
|       | Time_Point:Sexm      | 0.060    | 0.632 | 18.000 | 0.094   | 0.926        |
|       | Time_Point: Vgll3*LL | -0.969   | 0.626 | 17.860 | -1.548  | 0.139        |
|       |                      |          |       |        |         |              |
| PC    | Terms                | Estimate | SE    | df     | t-value | p            |
|       | Time_Point           | -0.373   | 0.142 | 17.186 | -2.634  | <b>0.017</b> |
|       | Sexm                 | -0.263   | 0.674 | 17.690 | -0.391  | 0.701        |
|       | Vgll3*LL             | -2.601   | 0.639 | 15.903 | -4.070  | <b>0.001</b> |
|       | Time_Point:Sexm      | 0.068    | 0.187 | 17.581 | 0.362   | 0.721        |
|       | Time_Point: Vgll3*LL | 0.798    | 0.176 | 15.310 | 4.520   | <b>0.000</b> |
|       |                      |          |       |        |         |              |
| PE    | Terms                | Estimate | SE    | df     | t-value | p            |
|       | Time_Point           | -0.286   | 0.145 | 17.682 | -1.965  | 0.065        |
|       | Sexm                 | 0.060    | 0.689 | 17.927 | 0.086   | 0.932        |
|       | Vgll3*LL             | -2.595   | 0.662 | 16.265 | -3.922  | <b>0.001</b> |
|       | Time_Point:Sexm      | -0.014   | 0.191 | 17.873 | -0.072  | 0.944        |
|       | Time_Point: Vgll3*LL | 0.748    | 0.183 | 15.799 | 4.085   | <b>0.001</b> |

301

302

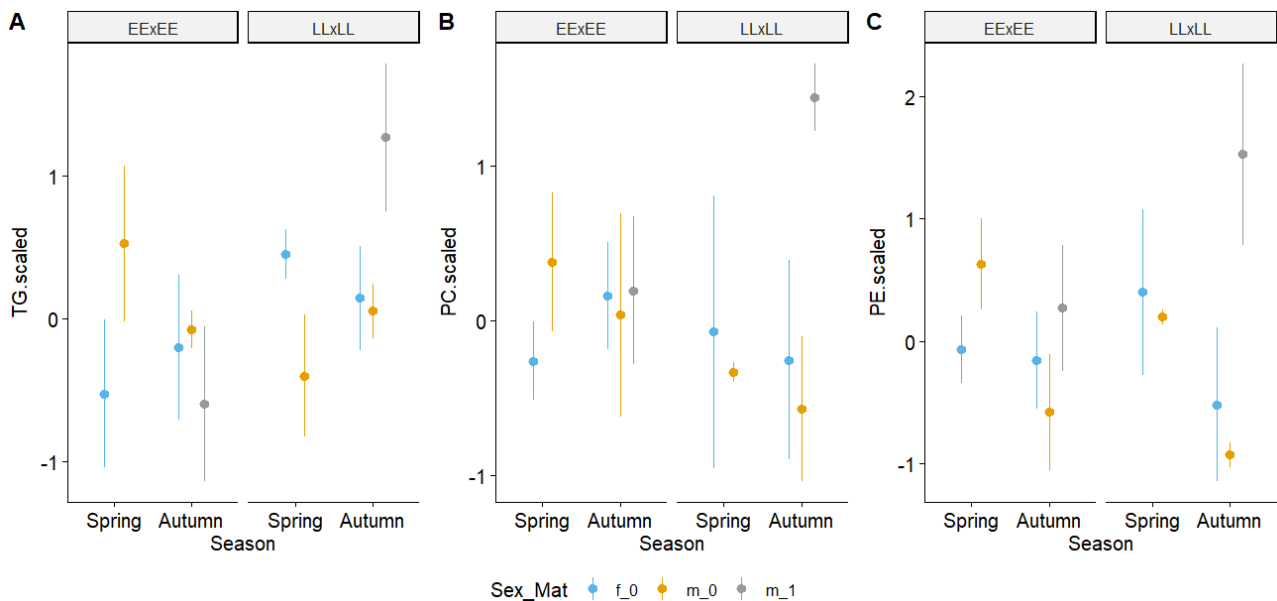

303

304

305 **Figure 3:** Scaled A) triacylglycerol (TG), B) phosphatidylcholine (PC) and C)  
 306 phosphatidylethanolamine (PE) concentrations of muscle in *vgll3*\*EE (EExEE) and *vgll3*\*LL  
 307 (LLxLL) immature females (f\_0), immature males (m\_0), and mature males (m\_1) between the  
 308 spring and autumn.

309

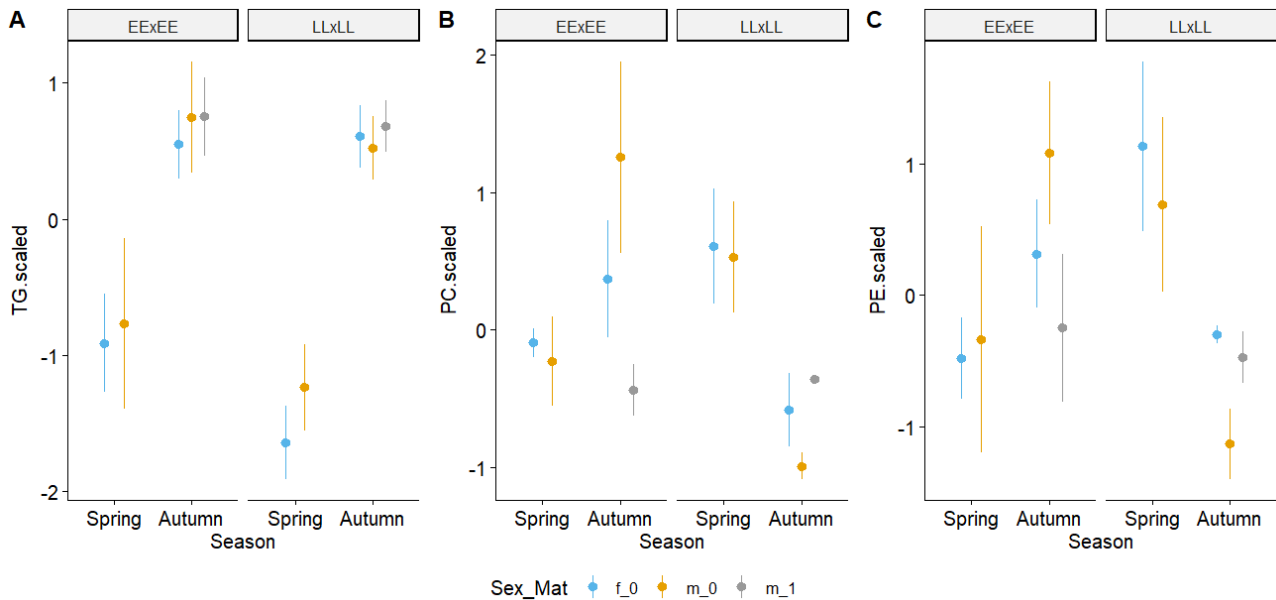

310

311 **Figure 4:** Scaled A) triacylglycerol (TG), B) phosphatidylcholine (PC) and C)  
 312 phosphatidylethanolamine (PE) concentrations of liver in *vgll3*\*EE (EExEE) and *vgll3*\*LL (LLxLL)  
 313 immature females (f\_0), immature males (m\_0), and mature males (m\_1) between the spring and  
 314 autumn.

315

### 316 *Maturation, sex, and *vgll3**

317 Mature males with the *vgll3*\*LL genotype had significantly higher TG and PC  
 318 concentrations in the muscle than *vgll3*\*EE individuals (Figure 3 A & B, Table 4). However,  
 319 this was based on data from only two *vgll3*\*LL mature males. No differences in lipid  
 320 concentrations were observed between immature males and females.

321 **Table 4:** Model results including mature males to test for lipid class and *vgll3* association  
 322 (Status (male/female: immature/mature) *vgll3* Genotype (*vgll3*\*EE = early maturation  
 323 /*vgll3*\*LL = late maturation)).

| Muscle |                  |          |       |        |         |       |
|--------|------------------|----------|-------|--------|---------|-------|
| TG     | Terms            | Estimate | SE    | df     | t-value | p     |
|        | Sex_Mat          | -0.849   | 0.573 | 17.893 | -1.482  | 0.156 |
|        | Vgll3*LL         | -0.262   | 0.522 | 16.494 | -0.502  | 0.623 |
|        | Sex_Mat:Vgll3*LL | 2.402    | 0.939 | 17.960 | 2.560   | 0.020 |
|        |                  |          |       |        |         |       |

| <b>PC</b>    |                   |          |        |        |         |        |
|--------------|-------------------|----------|--------|--------|---------|--------|
|              |                   | Estimate | SE     | df     | t-value | p      |
|              | Sex_Mat           | 0.076    | 0.466  | 11.574 | 0.164   | 0.873  |
|              | Vgll3*LL          | -0.598   | 0.485  | 9.531  | -1.232  | 0.248  |
|              | Sex_Mat: Vgll3*LL | 1.787    | 0.792  | 13.550 | 2.256   | 0.041  |
| <b>PE</b>    |                   |          |        |        |         |        |
|              |                   | Estimate | SE     | df     | t-value | p      |
|              | Sex_Mat           | 0.730    | 0.478  | 6.217  | 1.527   | 0.176  |
|              | Vgll3*LL          | -0.004   | 0.567  | 8.449  | -0.007  | 0.995  |
|              | Sex_Mat:Vgll3*LL  | 1.060    | 0.842  | 9.658  | 1.258   | 0.238  |
| <b>Liver</b> |                   |          |        |        |         |        |
| <b>TG</b>    |                   |          |        |        |         |        |
|              |                   | Estimate | SE     | df     | t-value | p      |
|              | Sex_Mat           | 0.610    | 0.622  | 13.000 | 0.980   | 0.345  |
|              | Vgll3*LL          | -0.499   | 0.562  | 13.000 | -0.888  | 0.391  |
|              | Sex_Mat: Vgll3*LL | 0.425    | 0.981  | 13.000 | 0.434   | 0.672  |
| <b>PC</b>    |                   |          |        |        |         |        |
|              |                   | Estimate | SE     | df     | t-value | p      |
|              | Sex_Mat           | -1.3931  | 0.6545 | 13     | -2.128  | 0.053  |
|              | Vgll3*LL          | -1.3468  | 0.5908 | 13     | -2.279  | 0.0402 |
|              | Sex_Mat: Vgll3*LL | 1.3253   | 1.0311 | 13     | 1.285   | 0.2211 |
| <b>PE</b>    |                   |          |        |        |         |        |
|              |                   | Estimate | SE     | df     | t-value | p      |
|              | Sex_Mat           | -0.801   | 0.784  | 13.000 | -1.023  | 0.325  |
|              | Vgll3*LL          | -0.783   | 0.707  | 13.000 | -1.107  | 0.288  |
|              | Sex_Mat: Vgll3*LL | 0.554    | 1.234  | 13.000 | 0.448   | 0.661  |

324

## 325 Discussion

326 We compared the lipid class concentrations and species profiles of juvenile Atlantic  
327 salmon at two key seasonal time points for early salmon life-history: spring and autumn.  
328 Lipid levels in the spring likely provide indications of energy use efficiency over the winter,  
329 as well as indicate the basal lipid reserves to build on for possible maturation in the coming  
330 autumn. However, lipid levels in the autumn reflect resources accumulated over the  
331 summer, and both the initial and newly acquired lipids potentially contribute to the  
332 available total energy source for the spawning event in the autumn (Rowe et al., 1991).  
333 Initiation of early maturation (as a two-year old parr) likely requires physiological changes  
334 due to the rapid developmental changes, including gonad development, needed to  
335 reproduce (Aksnes et al., 1986). We found that liver TG concentrations increased from  
336 spring to autumn, indicating that the liver is potentially an important lipid storage location in  
337 Atlantic salmon, as suggested for Arctic charr (Jobling et al., 1998) and white seabream

338 (Cejas et al., 2004). High lipid content in the liver can suggest physiological issues  
339 resembling non-alcoholic fatty liver in humans and involving lipid peroxidation and  
340 oxidative stress. However, we are currently just beginning to understand these  
341 mechanisms in salmon (Espe et al., 2019; Keinänen et al., 2022).

342 Additionally, we did not detect any significant differences between the sexes. In contrast, a  
343 previous study, House et al., (2021), suggested that males had higher concentrations of  
344 several lipid classes in the muscle compared to females, but that study was conducted on  
345 one year old juveniles which can potentially explain this difference. Another possible  
346 explanation for these differing results is that the current study included both mature and  
347 immature males whereas the previous study was conducted on younger and solely  
348 immature males, but may have included males with higher lipid levels that may have  
349 matured the following year. A more detailed study of male vs. female lipid differences  
350 across a longer time period would be useful for better understanding sex-specific lipid  
351 allocation strategies.

352 Despite muscle lipid class concentrations not showing any marked changes from spring to  
353 autumn, the individual lipid species composition changed markedly (Fig. 2A). The muscle  
354 TG species in the spring were highly unsaturated species that are used much less for fatty  
355 acid  $\beta$ -oxidation, potentially indicating acclimatization to low water temperature (Colombo  
356 et al., 2022; Wang et al., 2021). In contrast, the TG species accumulated during summer  
357 and detected in the autumn samples had a lower degree of unsaturation, which, during  
358 higher summer and autumn water temperature and physiological activity, may protect  
359 juvenile salmon against oxidative stress (Gray, 1978; Kjær et al., 2008). Adult female  
360 salmon with the largest reserves of polyunsaturated lipid are known to suffer from  
361 oxidative stress during spawning and fail to breed (Keinänen et al., 2022; Vuorinen et al.,  
362 2020). Therefore, the lipid species profiles of the juvenile salmon of this study suggest that  
363 distributing highly unsaturated fatty acids into phospholipids may reduce the rates of  
364 polyunsaturated fatty acid peroxidation and thereby reduce oxidative stress. .

365 Perhaps the most noteworthy finding of this study is the stark contrast in the direction of  
366 membrane lipid (PC and PE) concentration changes between seasons in *vg//3\*EE*  
367 individuals compared to *vg//3\*LL* individuals. This can possibly be explained by two  
368 scenarios, one involving genotype-specific differences in lipid synthesis, and another  
369 involving genotype-specific differences in lipid storage mechanisms. In the first scenario,  
370 the observed lipid concentrations could reflect differences in endoplasmic reticulum (ER)



371 volume in differing *vgll3* genotype individuals in the liver. The higher membrane lipid  
372 concentrations increasing from spring to autumn in *vgll3*\*EE individuals could be  
373 maintaining a more stable capacity of ER functions compared to the *vgll3*\*LL individuals  
374 decreasing from spring to autumn. The ER is one of the major sites of protein synthesis  
375 and fatty acid and lipid metabolism, including *de novo* synthesis of phospholipids and TG,  
376 while it also produces lipoprotein particles for transport of diverse biomolecules throughout  
377 the body, the TGs largely carried to the main storage sites, such as muscle myosepta and  
378 visceral adipose tissue (Jensen-Urstad & Semenkovich, 2012; Alves-Bezerra & Cohen,  
379 2017). Thus, this increase of membrane lipid concentrations in *vgll3*\*EE individuals may  
380 increase or retain capability for ER functions across seasons compared to the decrease of  
381 membrane lipids seen in *vgll3*\*LL individuals. For the second scenario, individuals could  
382 be storing lipid droplets in liver and other tissues in a genotypic-specific manner, resulting  
383 in the estimated contrast in the direction of membrane lipid (PC and PE) concentration  
384 changes from spring to autumn in *vgll3*\*EE individuals compared to *vgll3*\*LL individuals.  
385 Specifically, lipid droplets stored in the cytoplasm are the main storage organelles for  
386 metabolic energy in most cells (Prévost et al., 2018). The membrane lipid (PC and PE)  
387 concentration decrease from spring to autumn in *vgll3*\*LL individuals could be due to them  
388 storing larger lipid droplets in the liver compared to *vgll3*\*EE individuals, and thus  
389 increasing the mass of storage lipid at the expense of ER network mass. However, a more  
390 complete understanding of these genotype-based differences requires additional research.  
391 For example, *vgll3* genotype specific differences in transcriptomic data identified lipid  
392 metabolism genes, such as fatty acyl desaturases (FADS) and elongases of very long  
393 chain fatty acids (ELOVLs), known to be involved in fatty acid structural modifications  
394 (Datsomor et al., 2022; Kabeya et al., 2018) and also *vgll3* genotype specific differences in  
395 histological patterns of lipid droplet determination (hyperplastic vs hypertrophy) (Caballero  
396 et al., 2002).

397 Our findings in juvenile Atlantic salmon provide first hints at mechanisms by which *vgll3*  
398 contributes to the maintenance of salmon lipid reserves and metabolic capability across  
399 seasons. If *vgll3*\*EE individuals do indeed have increased ER metabolic activity with an  
400 increased concentration of membrane lipids from spring to autumn compared to the  
401 opposite trend in *vgll3*\*LL individuals, it would imply they may have a higher capacity for  
402 protein synthesis and thereby a better capability for production of phospholipid and TG  
403 across seasons. It would explain why *vgll3*\*EE individuals maintained a higher body

404 condition in the spring (House et al. 2023), which increases the probability of the ability to  
405 mature in the autumn. These results are in line with previous studies that reported for  
406 *vgll3*\*EE relative to *vgll3*\*LL individuals a higher aerobic scope (Prokkola et al., 2022),  
407 body condition (Debes et al., 2021) and also a more seasonally stable body condition  
408 (House et al., 2023).

409 In conclusion, we found that seasonality has a major impact on Atlantic salmon lipid  
410 profiles and with *vgll3* specific effects on membrane lipid concentrations. The precise  
411 mechanism linking *vgll3* with lipid metabolism and storage is still not clear, but this study  
412 adds to the increasing indirect evidence supporting the notion that such a mechanism  
413 exists. Atlantic salmon juveniles seem to exhibit genotype specific lipid profiles with  
414 *vgll3*\*EE individuals increasing membrane lipid concentrations between spring and autumn  
415 while *vgll3*\*LL individuals doing the opposite. Future work investigating *vgll3* specific  
416 genotype differences in the expression of lipid-metabolism related genes would help  
417 understand the mechanism by which *vgll3* influences maturation timing. Further,  
418 assessment of lipid profiles in additional tissues and at additional time points, ideally over  
419 a longer time period, would allow for a more systematic assessment of the processes  
420 influencing early maturation probability and seasonality effects in juvenile Atlantic salmon.

421

## 422 **References**

- 423 Ahi, E. P., & Sefc, K. M. (2018). Towards a gene regulatory network shaping the fins of the  
424 Princess cichlid. *Scientific Reports*, 8(1), Article 1. [https://doi.org/10.1038/s41598-018-](https://doi.org/10.1038/s41598-018-27977-y)  
425 [27977-y](https://doi.org/10.1038/s41598-018-27977-y)
- 426 Aksnes, A., Gjerde, B., & Roald, S. O. (1986). Biological, chemical and organoleptic changes  
427 during maturation of farmed Atlantic salmon, *Salmo salar*. *Aquaculture*, 53(1), 7–20.  
428 [https://doi.org/10.1016/0044-8486\(86\)90295-4](https://doi.org/10.1016/0044-8486(86)90295-4)
- 429 Alves-Bezerra, M., & Cohen, D. E. (2017). Triglyceride metabolism in the liver. *Comprehensive*  
430 *Physiology*, 8(1), 1–8. <https://doi.org/10.1002/cphy.c170012>
- 431 Åsheim, E. R., Debes, P. V., House, A., Liljeström, P., Niemelä, P. T., Siren, J. P., Erkinaro, J., &  
432 Primmer, C. R. (2023). Atlantic salmon (*Salmo salar*) age at maturity is strongly  
433 affected by temperature, population and age-at-maturity genotype. *Conservation*  
434 *Physiology*, 11(1), 1–16. <https://doi.org/10.1093/conphys/coac086>
- 435 Aykanat, T., Lindqvist, M., Pritchard, V. L., & Primmer, C. R. (2016). From population genomics to  
436 conservation and management: A workflow for targeted analysis of markers identified using  
437 genome-wide approaches in Atlantic salmon *Salmo salar*. *Journal of Fish Biology*, 89(6),  
438 2658–2679. <https://doi.org/10.1111/jfb.13149>
- 439 Ayllon, F., Kjærner-semb, E., Furmanek, T., Wennevik, V., Solberg, F., Dahle, G., Taranger, G. L.,  
440 & Glover, K. A. (2015). The *vgll3* locus controls age at maturity in wild and domesticated

- 441 Atlantic Salmon (<i>Salmo salar L.</i>) Males. *PLOS Genetics*, 11(11), 1–15.  
442 <https://doi.org/10.1371/journal.pgen.1005628>
- 443 Ayllon, F., Solberg, M. F., Glover, K. A., Mohammadi, F., Kjærner-Semb, E., Fjelldal, P. G.,  
444 Andersson, E., Hansen, T., Edvardsen, R. B., & Wargelius, A. (2019). The influence of vgll3  
445 genotypes on sea age at maturity is altered in farmed mowi strain Atlantic salmon. *BMC*  
446 *Genetics*, 20(1), 44. <https://doi.org/10.1186/s12863-019-0745-9>
- 447 Barson, N. J., Aykanat, T., Hindar, K., Baranski, M., Bolstad, G. H., Fiske, P., Jacq, C., Jensen, A.  
448 J., Johnston, S. E., Karlsson, S., Kent, M., Moen, T., Niemelä, E., Nome, T., Næsje, T. F.,  
449 Orell, P., Romakkaniemi, A., Sægrov, H., Urdal, K., ... Primmer, C. R. (2015). Sex-  
450 dependent dominance at a single locus maintains variation in age at maturity in salmon.  
451 *Nature*, 528(7582), 405–408. <https://doi.org/10.1038/nature16062>
- 452 Breitkopf, S. B., Ricoult, S. J. H., Yuan, M., Xu, Y., Peake, D. A., Manning, B. D., & Asara, J. M.  
453 (2017). A relative quantitative positive/negative ion switching method for untargeted  
454 lipidomics via high resolution LC-MS/MS from any biological source. *Metabolomics*, 13(3),  
455 30. <https://doi.org/10.1007/s11306-016-1157-8>
- 456 Caballero, M. J., Obach, A., Rosenlund, G., Montero, D., Gisvold, M., & Izquierdo, M. S. (2002).  
457 Impact of different dietary lipid sources on growth, lipid digestibility, tissue fatty acid  
458 composition and histology of rainbow trout, <i>Oncorhynchus mykiss</i>. *Aquaculture*,  
459 214(1–4), 253–271. [https://doi.org/10.1016/S0044-8486\(01\)00852-3](https://doi.org/10.1016/S0044-8486(01)00852-3)
- 460 Cejas, J. R., Almansa, E., Jérez, S., Bolaños, A., Samper, M., & Lorenzo, A. (2004). Lipid and fatty  
461 acid composition of muscle and liver from wild and captive mature female broodstocks of  
462 white seabream, *Diplodus sargus*. *Comparative Biochemistry and Physiology Part B:*  
463 *Biochemistry and Molecular Biology*, 138(1), 91–102.  
464 <https://doi.org/10.1016/j.cbpc.2004.03.003>
- 465 Colombo, S. M., Budge, S. M., Hall, J. R., Kornicer, J., & White, N. (2022). Atlantic salmon adapt to  
466 low dietary n-3 PUFA and warmer water temperatures by increasing feed intake and  
467 expression of n-3 biosynthesis-related transcripts. *Fish Physiology and Biochemistry*.  
468 <https://doi.org/10.1007/s10695-022-01157-2>
- 469 Datsomor, A. K., Gillard, G., Jin, Y., Olsen, R. E., & Sandve, S. R. (2022). Molecular Regulation of  
470 Biosynthesis of Long Chain Polyunsaturated Fatty Acids in Atlantic Salmon. *Marine*  
471 *Biotechnology*, 24(4), 661–670. <https://doi.org/10.1007/s10126-022-10144-w>
- 472 Debes, P. V., Piavchenko, N., Ruokolainen, A., Ovaskainen, O., Moustakas-Verho, J. E., Parre, N.,  
473 Aykanat, T., Erkinaro, J., & Primmer, C. R. (2021). Polygenic and major-locus contributions  
474 to sexual maturation timing in Atlantic salmon. *Molecular Ecology*, 30(18), 4505–4519.  
475 <https://doi.org/10.1111/mec.16062>
- 476 Espe, M., Xie, S., Chen, S., Pedro, A., & Holen, E. (2019). Development of a fatty liver model using  
477 oleic acid in primary liver cells isolated from Atlantic salmon and the prevention of lipid  
478 accumulation using metformin. *Aquaculture Nutrition*, 25(3), 737–746.  
479 <https://doi.org/10.1111/anu.12905>
- 480 Folch, J., Lees, M., & Stanley, G. H. S. (1957). A simple method for the isolation and purification of  
481 total lipids from animal tissues. *J Biol Chem*, 226(1), 497–509.  
482 <https://doi.org/10.1007/s10858-011-9570-9>
- 483 Gray, J. I. (1978). Measurement of lipid oxidation: A review. *Journal of the American Oil Chemists'*  
484 *Society*, 55(6), 539–546. <https://doi.org/10.1007/BF02668066>
- 485 Haimi, P., Uphoff, A., Hermansson, M., & Somerharju, P. (2006). Software Tools for Analysis of  
486 Mass Spectrometric Lipidome Data. *Analytical Chemistry*, 78(24), 8324–8331.  
487 <https://doi.org/10.1021/ac061390w>

- 488 Halperin, D. S., Pan, C., Lusi, A. J., & Tontonoz, P. (2013). Vestigial-like 3 is an inhibitor of  
489 adipocyte differentiation. *Journal of Lipid Research*, *54*, 473–481.  
490 <https://doi.org/10.1194/jlr.M032755>
- 491 Henderson, J. R., & Tocher, D. R. (1987). The lipid composition and biochemistry of freshwater  
492 fish. *Progress in Lipid Research*, *26*(4), 281–347. [https://doi.org/10.1016/0163-](https://doi.org/10.1016/0163-7827(87)90002-6)  
493 [7827\(87\)90002-6](https://doi.org/10.1016/0163-7827(87)90002-6)
- 494 Henriques, J., Dick, J. R., Tocher, D. R., & Bell, J. G. (2014). Nutritional quality of salmon products  
495 available from major retailers in the UK: Content and composition of n-3 long-chain PUFA.  
496 *British Journal of Nutrition*, *112*(6), 964–975. <https://doi.org/10.1017/S0007114514001603>
- 497 Herbinger, C. M., & Friars, G. W. (1991). Correlation between condition factor and total lipid  
498 content in Atlantic salmon, *Salmo salar* L., parr. *Aquaculture Research*, *22*(4), 527–  
499 529. <https://doi.org/10.1111/j.1365-2109.1991.tb00766.x>
- 500 House, A. H., Debes, P. V., Kurko, J., Erkinaro, J., Käkelä, R., & Primmer, C. R. (2021). Sex-  
501 specific lipid profiles in the muscle of Atlantic salmon juveniles. *Comparative Biochemistry*  
502 *and Physiology - Part D: Genomics and Proteomics*, *38*(January).  
503 <https://doi.org/10.1016/j.cbd.2021.100810>
- 504 House, A. H., Debes, P. V., Kurko, J., Erkinaro, J., & Primmer, C. R. (2023). *Genotype-specific*  
505 *variation in seasonal body condition at a large-effect maturation locus* | *bioRxiv*. <https://doi.org/10.1101/2023.01.15.524064>
- 506 Jensen-Urstad, A. P. L., & Semenkovich, C. F. (2012). Fatty acid synthase and liver triglyceride  
507 metabolism: Housekeeper or messenger? *Biochimica et Biophysica Acta*, *1821*(5), 747–  
508 753. <https://doi.org/10.1016/j.bbali.2011.09.017>
- 509 Jobling, M., Johansen, S. J. S., Foshaug, H., Burkow, I. C., & Jørgensen, E. H. (1998). Lipid  
510 dynamics in anadromous Arctic charr, *Salvelinus alpinus* (L.): Seasonal variations in lipid  
511 storage depots and lipid class composition. *Fish Physiology and Biochemistry*, *18*(3), 225–  
512 240. <https://doi.org/10.1023/A:1007747201521>
- 513 Jonsson, B., & Jonsson, N. (2005). Lipid energy reserves influence life-history decision of Atlantic  
514 salmon (*Salmo salar*) and brown trout (*S. trutta*) in fresh water. *Ecology of*  
515 *Freshwater Fish*, 296–301. <https://doi.org/10.1111/j.1600-0633.2005.00098.x>
- 516 Jonsson, N., & Jonsson, B. (2003). Energy allocation among developmental stages, age groups,  
517 and types of Atlantic salmon (*Salmo salar*) spawners. *Canadian Journal of Fisheries*  
518 *and Aquatic Sciences*, *60*(5), 506–516. <https://doi.org/10.1139/F03-042>
- 519 Jonsson, N., Jonsson, B., & Hansen, L. P. (1997). Changes in proximate composition and  
520 estimates of energetic costs during upstream migration and spawning in Atlantic salmon  
521 *Salmo salar*. *The Journal of Animal Ecology*, *66*(3), 425. <https://doi.org/10.2307/5987>
- 522 Kabeya, N., Yevzelman, S., Oboh, A., Tocher, D. R., & Monroig, O. (2018). Essential fatty acid  
523 metabolism and requirements of the cleaner fish, ballan wrasse *Labrus bergylta*: Defining  
524 pathways of long-chain polyunsaturated fatty acid biosynthesis. *Aquaculture*, *488*, 199–206.  
525 <https://doi.org/10.1016/j.aquaculture.2018.01.039>
- 526 Keinänen, M., Nikonen, S., Käkelä, R., Ritvanen, T., Rokka, M., Myllylä, T., Pönni, J., & Vuorinen,  
527 P. J. (2022). High lipid content of prey fish and n-3 PUFA peroxidation impair the thiamine  
528 status of feeding-migrating Atlantic salmon (*Salmo salar*) and is reflected in hepatic  
529 biochemical indices. *Biomolecules*, *12*(4), Article 4. <https://doi.org/10.3390/biom12040526>
- 530 Kjær, M. A., Todorčević, M., Torstensen, B. E., Vegusdal, A., & Ruyter, B. (2008). Dietary n-3  
531 HUFAs Affects Mitochondrial Fatty Acid  $\beta$ -Oxidation Capacity and Susceptibility to Oxidative  
532 Stress in Atlantic Salmon. *Lipids*, *43*(9), 813–827. [https://doi.org/10.1007/s11745-008-](https://doi.org/10.1007/s11745-008-3208-z)  
533 [3208-z](https://doi.org/10.1007/s11745-008-3208-z)

- 535 Manor, M. L., Weber, G. M., Cleveland, B. M., & Kenney, P. B. (2014). Effects of feeding level and  
536 sexual maturation on fatty acid composition of energy stores in diploid and triploid rainbow  
537 trout (<i>Oncorhynchus mykiss</i>). *Aquaculture*, 418–419, 17–25.  
538 <https://doi.org/10.1016/j.aquaculture.2013.09.023>
- 539 Mobley, K. B., Aykanat, T., Czorlich, Y., House, A., Kurko, J., Miettinen, A., Moustakas-Verho, J.,  
540 Salgado, A., Sinclair-Waters, M., Verta, J.-P., & Primmer, C. R. (2021). Maturation in  
541 Atlantic salmon (<i>Salmo salar</i>, Salmonidae<i></i>): A synthesis of ecological, genetic, and  
542 molecular processes. *Reviews in Fish Biology and Fisheries*, 31(3), 523–571.  
543 <https://doi.org/10.1007/s11160-021-09656-w>
- 544 Morgan, I. J., McCarthy, I. D., & Metcalfe, N. B. (2002). The influence of life-history strategy on lipid  
545 metabolism in overwintering juvenile Atlantic salmon. *Journal of Fish Biology*, 60(3), 674–  
546 686. <https://doi.org/10.1006/jfbi.2002.1886>
- 547 Piironen, J., Kiiskinen, P., Huuskonen, H., Heikura-Ovaskainen, M., & Vornanen, M. (2013).  
548 Comparison of smoltification in Atlantic salmon (*Salmo salar*) from anadromous and  
549 landlocked populations under common garden conditions. *Annales Zoologici Fennici*, 50(1–  
550 2), 1–15. <https://doi.org/10.5735/086.050.0101>
- 551 Post, J. R., & Parkinson, E. A. (2001). Energy allocation strategy in young fish: Allometry and  
552 survival. *Ecology*, 82(4), 1040–1051. [https://doi.org/10.1890/0012-9658\(2001\)082\[1040:EASIYF\]2.0.CO;2](https://doi.org/10.1890/0012-9658(2001)082[1040:EASIYF]2.0.CO;2)
- 554 Prévost, C., Sharp, M. E., Kory, N., Lin, Q., Voth, G. A., Farese, R. V., & Walther, T. C. (2018).  
555 Mechanism and determinants of amphipathic helix-containing protein targeting to lipid  
556 droplets. *Developmental Cell*, 44(1), 73–86.e4. <https://doi.org/10.1016/j.devcel.2017.12.011>
- 557 Prokkola, J. M., Åsheim, E. R., Morozov, S., Bangura, P., Erkinaro, J., Ruokolainen, A., Primmer,  
558 C. R., & Aykanat, T. (2022). Genetic coupling of life-history and aerobic performance in  
559 Atlantic salmon. *Proceedings of the Royal Society B: Biological Sciences*, 289(1967).  
560 <https://doi.org/10.1098/rspb.2021.2500>
- 561 Raclot, T. (2003). Selective mobilization of fatty acids from adipose tissue triacylglycerols.  
562 *Progress in Lipid Research*, 42(4), 257–288. [https://doi.org/10.1016/S0163-7827\(02\)00066-8](https://doi.org/10.1016/S0163-7827(02)00066-8)  
563 8
- 564 Rey, F., Melo, T., Lopes, D., Couto, D., Marques, F., & Domingues, M. R. (2022). Applications of  
565 lipidomics in marine organisms: Progress, challenges and future perspectives. *Molecular  
566 Omics*, 18(5), 357–386. <https://doi.org/10.1039/D2MO00012A>
- 567 Rowe, D. K., Thorpe, J. E., & Shanks, A. M. (1991). Role of fat stores in the maturation of male  
568 Atlantic salmon (<i>Salmo salar</i>) parr. *Canadian Journal of Fisheries and Aquatic  
569 Sciences*, 48, 405–413.
- 570 Schulte-Hostedde, A. I., Zinner, B., Millar, J. S., & Hickling, G. J. (2005). Restitution of mass–size  
571 residuals: Validating body condition indices. *Ecology*, 86(1), 155–163.  
572 <https://doi.org/10.1890/04-0232>
- 573 Shearer, K. D., & Swanson, P. (2000). *The effect of whole body lipid on early sexual maturation of  
574 1 q age male chinook salmon ž Oncorhynchus tshawytscha /.*
- 575 Sheridan, M. A. (1988). Lipid dynamics in fish: Aspects of absorption, transportation, deposition  
576 and mobilization. *Comparative Biochemistry and Physiology -- Part B: Biochemistry And*,  
577 90(4), 679–690. [https://doi.org/10.1016/0305-0491\(88\)90322-7](https://doi.org/10.1016/0305-0491(88)90322-7)
- 578 Sheridan, M. A. (1989). Alterations in lipid metabolism accompanying smoltification and seawater  
579 adaptation of salmonid fish. *Aquaculture*, 82, 191–203.
- 580 Sinclair-Waters, M., Nome, T., Wang, J., Lien, S., Kent, M. P., Sægrov, H., Florø-Larsen, B.,  
581 Bolstad, G. H., Primmer, C. R., & Barson, N. J. (2022). Dissecting the loci underlying

- 582 maturation timing in Atlantic salmon using haplotype and multi-SNP based association  
583 methods. *Heredity*, 129(6), Article 6. <https://doi.org/10.1038/s41437-022-00570-w>
- 584 Sinclair-Waters, M., Piavchenko, N., Ruokolainen, A., Aykanat, T., Erkinaro, J., & Primmer, C. R.  
585 (2022). Refining the genomic location of single nucleotide polymorphism variation affecting  
586 Atlantic salmon maturation timing at a key large-effect locus. *Molecular Ecology*, 31(2),  
587 562–570. <https://doi.org/10.1111/mec.16256>
- 588 Sissener, N. H., Torstensen, B. E., Owen, M. A. G., Liland, N. S., Stubhaug, I., & Rosenlund, G.  
589 (2017). Temperature modulates liver lipid accumulation in Atlantic salmon (*Salmo salar*  
590 L.) fed low dietary levels of long-chain n-3 fatty acids. *Aquaculture Nutrition*, 23(4), 865–  
591 878. <https://doi.org/10.1111/anu.12453>
- 592 Sutton, S. G., Bult, T. P., & Haedrich, R. L. (2000). Relationships among fat weight, body weight,  
593 water weight, and condition factors in wild Atlantic salmon parr. *Transactions of the*  
594 *American Fisheries Society*, 129(2), 527–538. [https://doi.org/10.1577/1548-](https://doi.org/10.1577/1548-8659(2000)129<0527:rafwbw>2.0.co;2)  
595 [8659\(2000\)129<0527:rafwbw>2.0.co;2](https://doi.org/10.1577/1548-8659(2000)129<0527:rafwbw>2.0.co;2)
- 596 Tocher, D. R. (2003). Metabolism and functions of lipids and fatty acids in teleost fish. *Reviews in*  
597 *Fisheries Science*, 11(2), 107–184. <https://doi.org/10.1080/713610925>
- 598 Tønning, K. A., Budge, S. M., & Tyedmers, P. (2021). Overwinter changes in the lipid profile of  
599 young-of-the-year striped bass (*Morone saxatilis*) in freshwater ponds. *Biomolecules*,  
600 11(11), Article 11. <https://doi.org/10.3390/biom11111678>
- 601 van den Berg, R. A., Hoefsloot, H. C., Westerhuis, J. A., Smilde, A. K., & van der Werf, M. J.  
602 (2006). Centering, scaling, and transformations: Improving the biological information  
603 content of metabolomics data. *BMC Genomics*, 7(1), 142. [https://doi.org/10.1186/1471-](https://doi.org/10.1186/1471-2164-7-142)  
604 [2164-7-142](https://doi.org/10.1186/1471-2164-7-142)
- 605 Vuorinen, P. J., Rokka, M., Ritvanen, T., Käkälä, R., Nikonen, S., Pakarinen, T., & Keinänen, M.  
606 (2020). Changes in thiamine concentrations, fatty acid composition, and some other lipid-  
607 related biochemical indices in Baltic Sea Atlantic salmon (*Salmo salar*) during the  
608 spawning run and pre-spawning fasting. *Helgoland Marine Research*, 74(1), 10.  
609 <https://doi.org/10.1186/s10152-020-00542-9>
- 610 Wang, C., Gong, Y., Deng, F., Ding, E., Tang, J., Codling, G., Challis, J. K., Green, D., Wang, J.,  
611 Chen, Q., Xie, Y., Su, S., Yang, Z., Raine, J., Jones, P. D., Tang, S., & Giesy, J. P. (2021).  
612 Remodeling of Arctic char (*Salvelinus alpinus*) lipidome under a stimulated scenario  
613 of Arctic warming. *Global Change Biology*, 27(14), 3282–3298.  
614 <https://doi.org/10.1111/gcb.15638>
- 615 Wickham, H. (2011). *Ggplot2*. <https://wires.onlinelibrary.wiley.com/doi/full/10.1002/wics.147>
- 616 Wickham, H., Averick, M., Bryan, J., Chang, W., McGowan, L. D., François, R., Grolemond, G.,  
617 Hayes, A., Henry, L., Hester, J., Kuhn, M., Pedersen, T. L., Miller, E., Bache, S. M., Müller,  
618 K., Ooms, J., Robinson, D., Seidel, D. P., Spinu, V., ... Yutani, H. (2019). Welcome to the  
619 Tidyverse. *Journal of Open Source Software*, 4(43), 1686.  
620 <https://doi.org/10.21105/joss.01686>
- 621 Yeo, J., & Parrish, C. C. (2022). Mass spectrometry-based lipidomics in the characterization of  
622 individual triacylglycerol (TAG) and phospholipid (PL) species from marine sources and  
623 their beneficial health effects. *Reviews in Fisheries Science & Aquaculture*, 30(1), 81–100.  
624 <https://doi.org/10.1080/23308249.2021.1897968>
- 625  
626  
627
